# Supplementary material
Source: Springer Nature journal article supplement (https://www.springermedizin.de/resource/supplementary/13075_2012_3845_MOESM2_ESM.pdf/9695458)

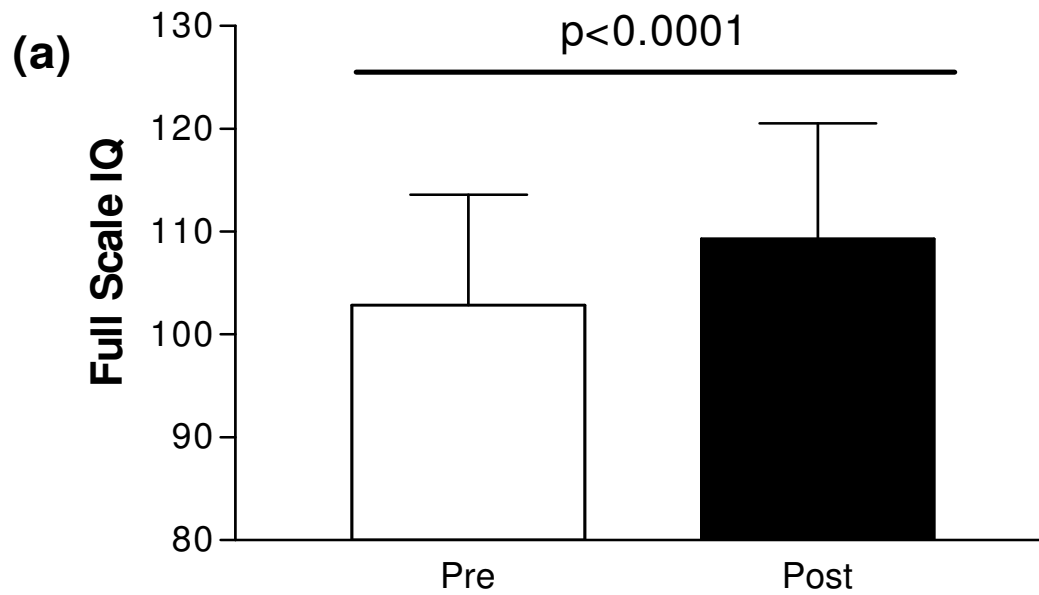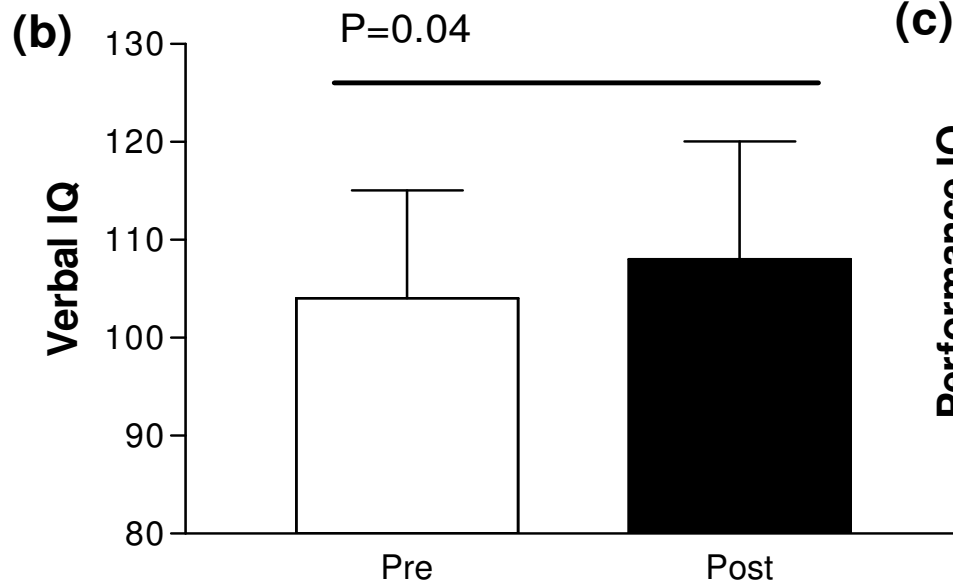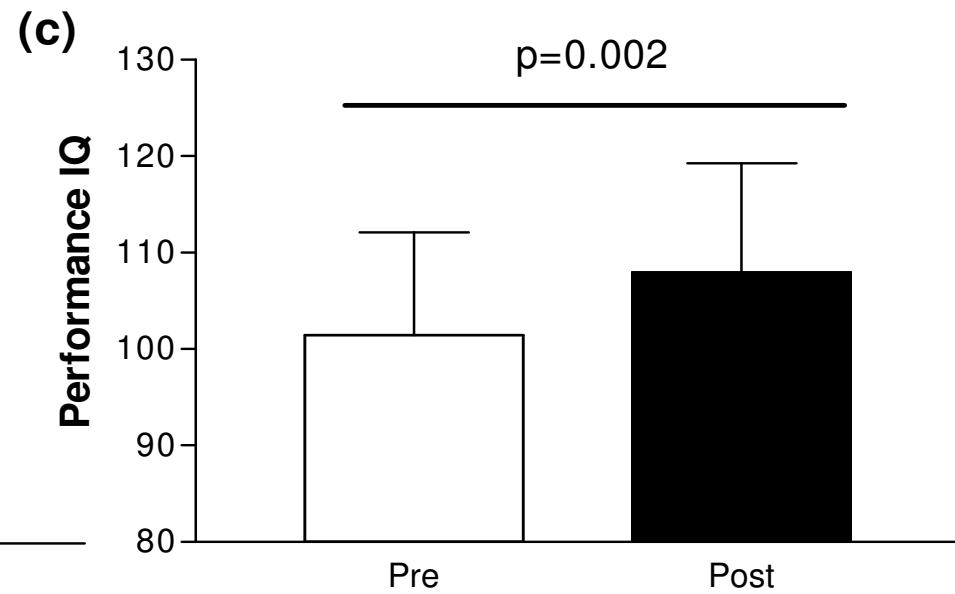

Supplement: MOESM2 [file 9695458]
